# Supplementary material for: A durable luminescent ionic polymer for rapid detection and efficient removal of toxic Cr2O72−
Source: Royal Society of Chemistry journal article supplement (doi:10.1039/c6ta03516g), 2016-01-01
Supplement: c6ta03516g1.pdf [file c6ta03516g1.pdf]

## Electronic Supplementary Information

*for*

### **A Durable Luminescent Ionic Polymer for Rapid Detection and Efficient Removal of Toxic $\text{Cr}_2\text{O}_7^{2-}$**

Yangxin Wang,<sup>a,b</sup> Huaixia Zhao,<sup>a</sup> Xinxiong Li<sup>a</sup> and Ruihu Wang<sup>\*a</sup>

*<sup>a</sup> State Key Laboratory of Structural Chemistry, Fujian Institute of Research on the Structure of Matter, Chinese Academy of Sciences, Fuzhou, Fujian, 350002, China*

*<sup>b</sup> University of Chinese Academy of Sciences, Beijing 100049, China*

*\*E-mail: ruihu@fjirsm.ac.cn*

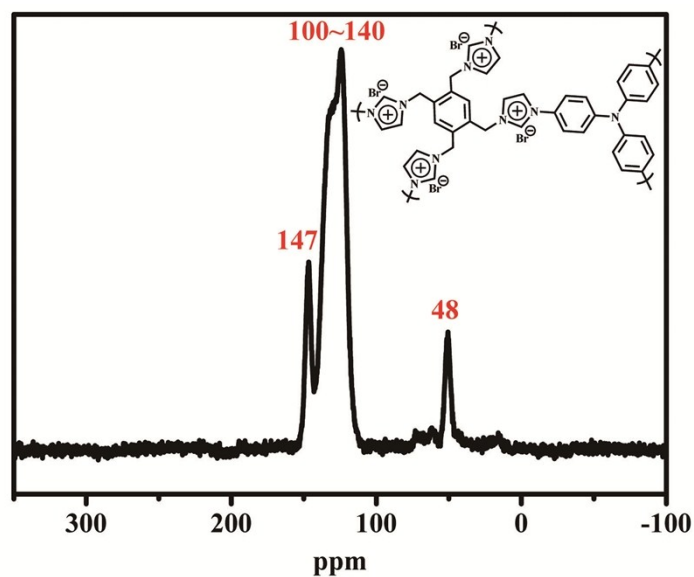

**Fig. S1** Solid-state  $^{13}\text{C}$  NMR spectrum of IMIP-Br.

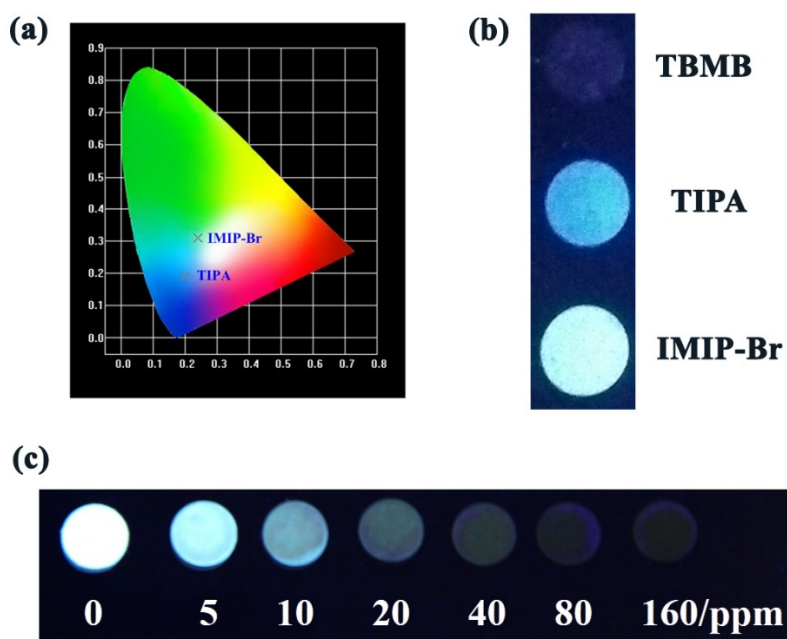

**Fig. S2** (a) CIE chromaticity diagram for TIPA ( $x$ : 0.20,  $y$ : 0.19) and IMIP-Br ( $x$ : 0.24,  $y$ : 0.31); (b) luminescent photographs of TBMB, TIPA and IMIP-Br excited at 365 nm; (c) luminescent photographs of IMIP-Br (0.047 mmol, 15 mg) after immersion in different concentrations of aqueous  $\text{K}_2\text{Cr}_2\text{O}_7$  solution (35 mL). The circular slices are prepared by pressing IMIP-Br (10 mg) under 10 MPa in a mould with a diameter of 6 mm.

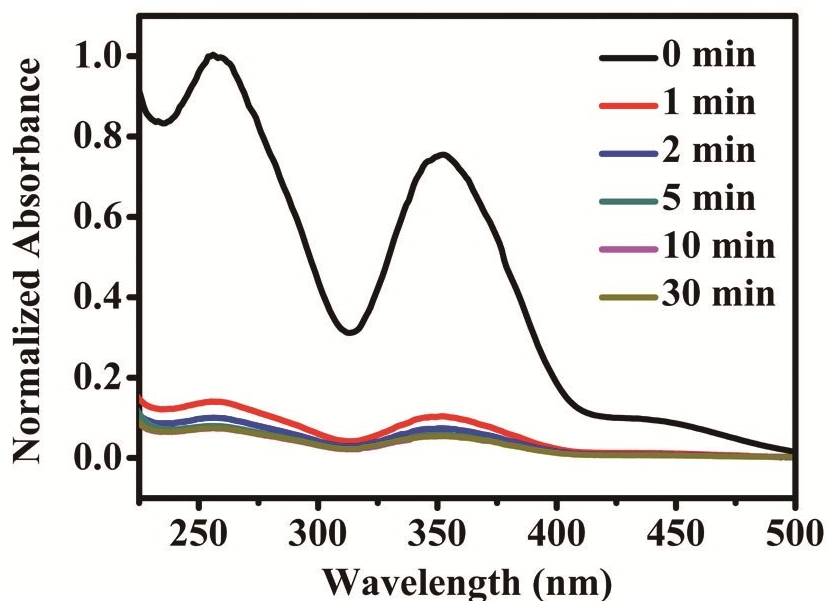

**Fig. S3** (a) UV-Vis spectra of aqueous  $K_2Cr_2O_7$  solution ( $0.55 \text{ mmol L}^{-1}$ , 20 mL) before and after anion exchanging with IMIP-Br (0.022 mmol, 6.9 mg); (b) colour of IMIP-Br and IMIP-Cr.

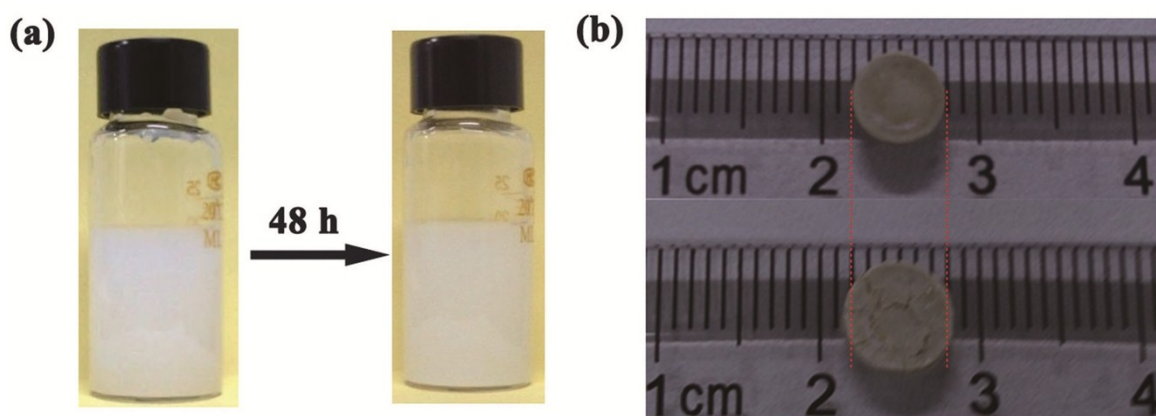

**Fig. S4** (a) Photographs of IMIP-Br in water by sonication (left) and after standing for 48 h (right); (b) adsorption-swelling experiment of IMIP-Br (upper: the original slice; bottom: the slice after one drop of water was added). The circular slices are prepared by pressing IMIP-Br (10 mg) under 10 MPa in a mould with a diameter of 6 mm.

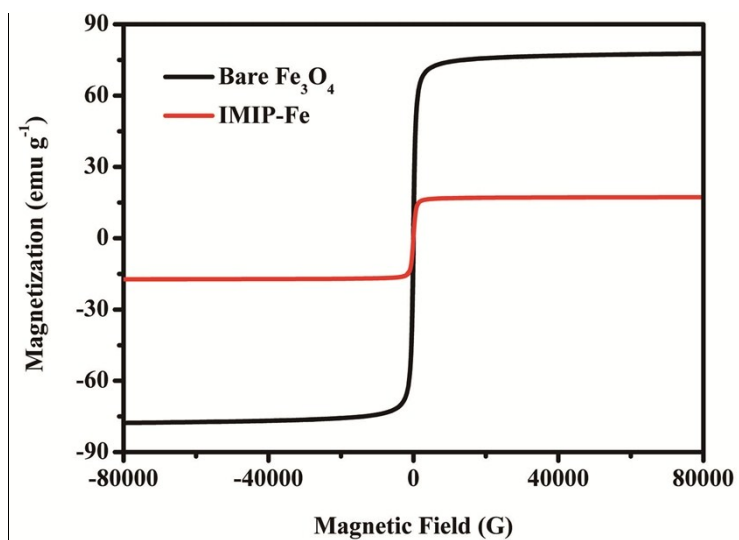

**Fig. S5** Field-dependent magnetization curves at 300 K for bare Fe<sub>3</sub>O<sub>4</sub> and IMIP-Fe.

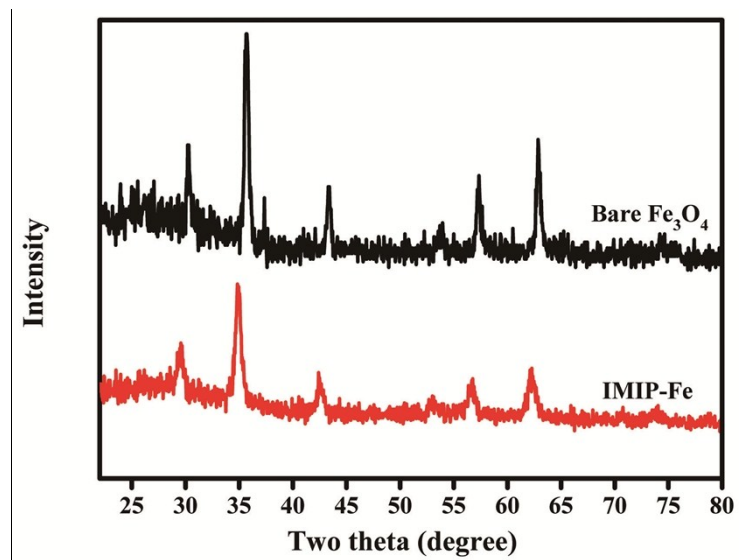

**Fig. S6** PXRD patterns for bare Fe<sub>3</sub>O<sub>4</sub> and IMIP-Fe.

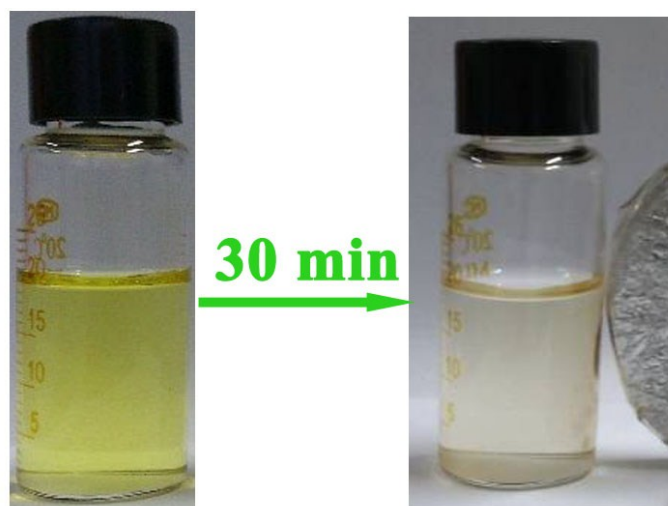

**Fig. S7** Photographs of colour change of aqueous  $\text{K}_2\text{Cr}_2\text{O}_7$  solution ( $0.55 \text{ mmol L}^{-1}$ , 20 mL) and magnetic separation of IMIP-Fe after anion exchange.

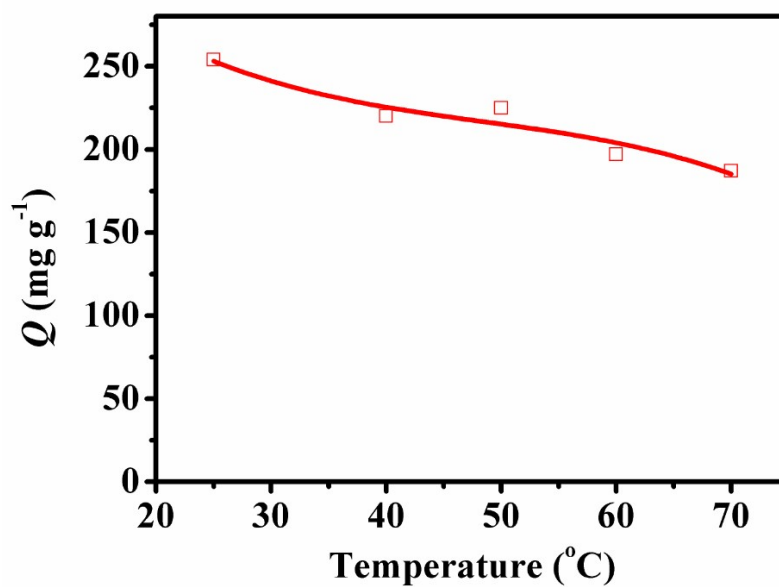

**Fig. S8** Capture capacity of IMIP-Fe for  $\text{Cr}_2\text{O}_7^{2-}$  within 5 min at different temperatures.

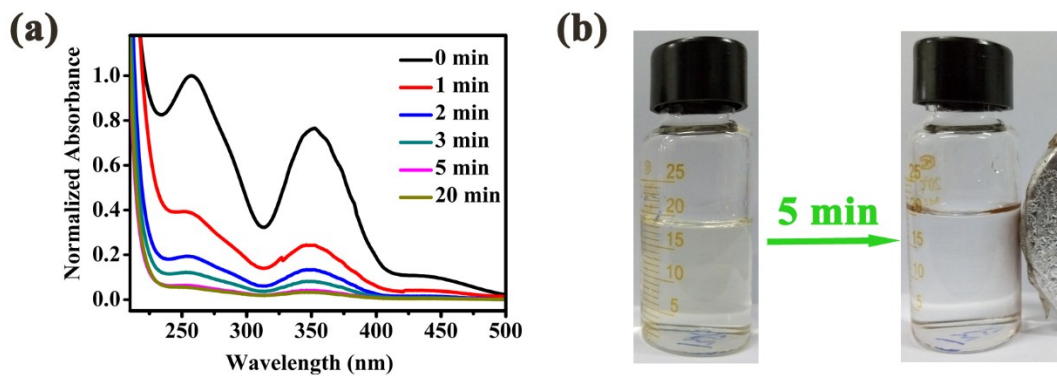

**Fig. S9** (a) UV-Vis spectra of aqueous  $K_2Cr_2O_7$  solution (0.055 mmol L<sup>-1</sup>, 20 mL) during exchange with IMIP-Fe ( $4.4 \times 10^{-3}$  mmol, 1.8 mg); (b) photographs of colour change of the aqueous  $K_2Cr_2O_7$  solution and the magnetic separation of IMIP-Fe after exchange.

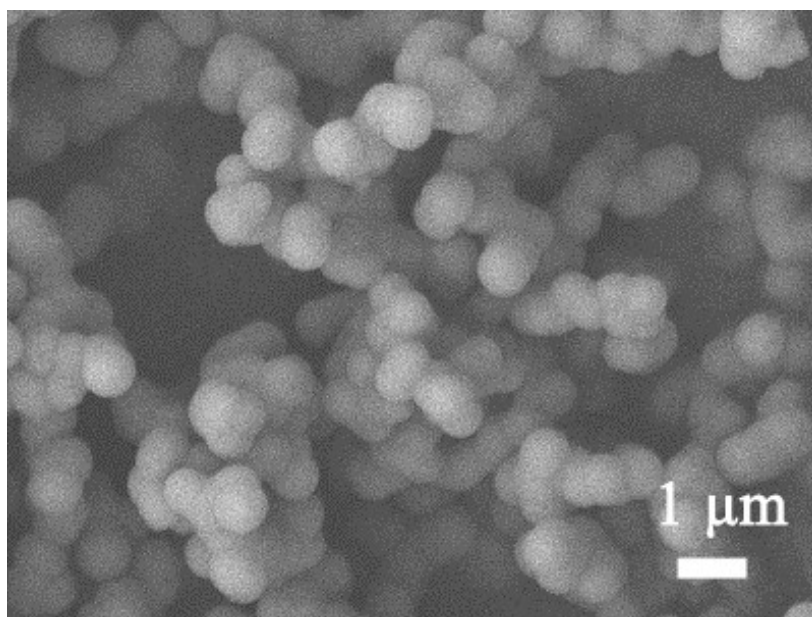

**Fig. S10** SEM image of IMIP-Fe after using for consecutive six cycles.

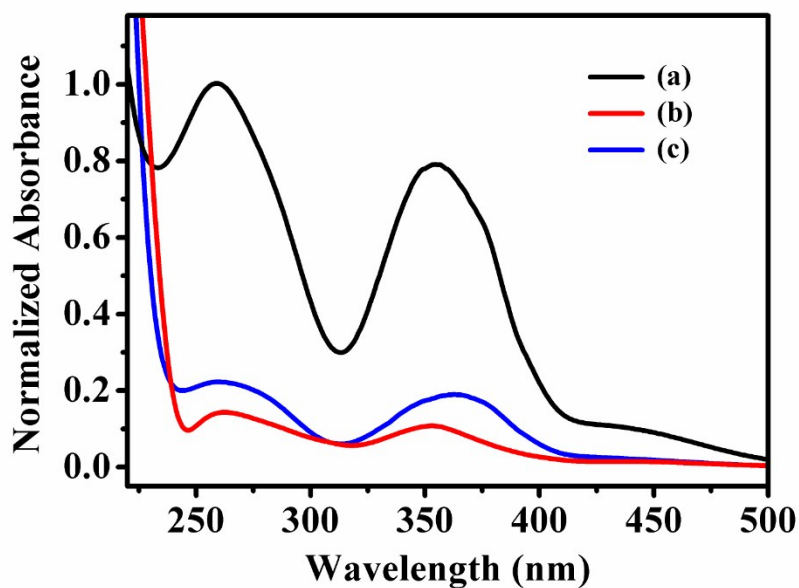

**Fig. S11** UV-Vis spectra of  $K_2Cr_2O_7$  aqueous solution (20 mL) during exchange with IMIP-Fe in selective adsorption experiment. (a) Initial  $K_2Cr_2O_7$  aqueous solution ( $Cr_2O_7^{2-}$  0.011 mmol); (b) aqueous solution contains  $Cr_2O_7^{2-}$  0.011 mmol,  $NO_3^-$  0.022 mmol,  $Cl^-$  0.022 mmol and  $BF_4^-$  0.022 mmol; (c) aqueous solution contains  $Cr_2O_7^{2-}$  0.011 mmol,  $NO_3^-$  0.022 mmol,  $Cl^-$  0.022 mmol,  $BF_4^-$  0.022 mmol, and  $SO_4^{2-}$  0.011 mmol.

**Table S1.** Capture capacities for  $Cr_2O_7^{2-}$  of IMIP-Br, IMIP-Fe and reported cationic MOFs.

| Cationic materials                     | Maximum capacities ( $mg\ g^{-1}$ ) | References |
|----------------------------------------|-------------------------------------|------------|
| $Ag_2(btr)_2 \cdot 2ClO_4 \cdot 3H_2O$ | 212.8                               | S1         |
| FIR-53                                 | 74.2                                | S2         |
| FIR-54                                 | 103.1                               | S2         |
| ZJU-101                                | 245                                 | S3         |
| MOR-1-HA                               | 242±17                              | S4         |
| MOR-1-HA                               | 280±19                              | S5         |
| 1- $SO_4^{2-}$                         | 166                                 | S6         |
| IMIP-Br                                | 318                                 | this work  |
| IMIP-Fe                                | 251                                 | this work  |

## References:

- S1. X. Li, H. Xu, F. Kong and R. Wang, *Angew. Chem. Int. Ed.*, 2013, **52**, 13769-13773.
- S2. H. R. Fu, Z. X. Xu and J. Zhang, *Chem. Mater.*, 2015, **27**, 205-210.
- S3. Q. Zhang, J. Yu, J. Cai, L. Zhang, Y. Cui, Y. Yang, B. Chen and G. Qian, *Chem. Commun.*, 2015, **51**, 14732-14734.
- S4. S. Rapti, A. Pournara, D. Sarma, I. T. Papadas, G. S. Armatas, A. C. Tsipis, T. Lazarides, M. G. Kanatzidis and M. J. Manos, *Chem. Sci.*, 2016, **7**, 2427-2436.
- S5. S. Rapti, A. Pournara, D. Sarma, I. T. Papadas, G. S. Armatas, Y. S. Hassan, M. H. Alkordi, M. G. Kanatzidis and M. J. Manos, *Inorg. Chem. Front.*, 2016, **3**, 635-644.
- S6. A. V. Desai, B. Manna, A. Karmakar, A. Sahu and S. K. Ghosh, *Angew. Chem. Inter. Ed.*, 2016, DOI: 10.1002/anie.201600185.
